# Supplementary material for: Increased expression of long non-coding RNA CCEPR is associated with poor prognosis and promotes tumorigenesis in urothelial bladder carcinoma
Source: PubMed Central journal article supplement (PMC5546483; doi:10.18632/oncotarget.17872), 2017-05-15
Supplement: oncotarget-08-44326-s001.pdf [file oncotarget-08-44326-s001.pdf]

## Increased expression of long non-coding RNA CCEPR is associated with poor prognosis and promotes tumorigenesis in urothelial bladder carcinoma

### Supplementary Materials

**Supplementary Table 1: Summary of clinicopathological features of tissues of bladder cancer**

| Pt No. | Sex | Age | Stage   | Grade | Pt No. | Sex | Age | Stage   | Grade |
|--------|-----|-----|---------|-------|--------|-----|-----|---------|-------|
| 1      | M   | 66  | T2bN0M0 | H     | 29     | M   | 58  | T4aN0M0 | H     |
| 2      | M   | 53  | T1N0M0  | L     | 30     | M   | 63  | T2aN0M0 | L     |
| 3      | M   | 75  | T2bN0M0 | H     | 31     | M   | 50  | T2bN0M0 | H     |
| 4      | F   | 64  | T1N0M0  | L     | 32     | M   | 73  | T3bN0M0 | H     |
| 5      | M   | 58  | T3aN0M0 | H     | 33     | F   | 62  | T4aN0M0 | H     |
| 6      | M   | 65  | T2bN0M0 | H     | 34     | M   | 41  | T1N0M0  | L     |
| 7      | F   | 38  | T3aN0M0 | H     | 35     | M   | 62  | T4aN0M0 | H     |
| 8      | M   | 59  | T2bN0M0 | H     | 36     | M   | 76  | T2bN0M0 | L     |
| 9      | M   | 43  | T3aN0M0 | H     | 37     | M   | 25  | T1N0M0  | L     |
| 10     | F   | 64  | T2bN0M0 | H     | 38     | F   | 74  | T3aN0M0 | H     |
| 11     | M   | 69  | T1N0M0  | L     | 39     | F   | 70  | T1N0M0  | L     |
| 12     | M   | 72  | T3aN0M0 | H     | 40     | M   | 59  | T4N0M0  | H     |
| 13     | F   | 89  | T1N0M0  | L     | 41     | F   | 72  | T1N0M0  | L     |
| 14     | M   | 68  | T2bN0M0 | H     | 42     | M   | 46  | T1N0M0  | L     |
| 15     | F   | 63  | T3aN0M0 | H     | 43     | M   | 63  | T3aN0M0 | H     |
| 16     | M   | 63  | T2bN0M0 | H     | 44     | M   | 86  | T1N0M0  | L     |
| 17     | M   | 78  | T2aN0M0 | L     | 45     | M   | 70  | T2bN0M0 | H     |
| 18     | M   | 70  | T2aN0M0 | L     | 46     | M   | 49  | T1N0M0  | L     |
| 19     | F   | 41  | T2aN0M0 | L     | 47     | M   | 61  | T3aN0M0 | H     |
| 20     | M   | 59  | T2bN0M0 | H     | 48     | M   | 53  | T2aN0M0 | L     |
| 21     | F   | 73  | T2aN0M0 | L     | 49     | M   | 73  | T2bN1M0 | H     |
| 22     | M   | 67  | T2bN0M0 | H     | 50     | M   | 47  | T2aN0M0 | L     |
| 23     | F   | 61  | T3aN0M0 | H     | 51     | M   | 77  | T3aN0M0 | H     |
| 24     | F   | 51  | T1N0M0  | L     | 52     | M   | 66  | T1N0M0  | L     |
| 25     | M   | 58  | T4aN3M0 | H     | 53     | F   | 74  | T2bN0M0 | H     |
| 26     | M   | 63  | T2aN0M0 | L     | 54     | F   | 60  | T2aN0M0 | H     |
| 27     | M   | 57  | T4aN0M0 | H     | 55     | M   | 68  | T1N0M0  | L     |
| 28     | M   | 54  | T2bN0M0 | H     |        |     |     |         |       |

Pt No. patient number; M male; F female; Grade the World Health Organization 2004 classification; H high; L low; Stage the American Joint Committee on Cancer TNM classification.

**Supplementary Table 2: The primer sequences included in this study**

| Name          | primer sequences (5'-3') |
|---------------|--------------------------|
| CCEPR forward | AAGGTCCCAGGATACTCGC      |
| CCEPR reverse | GTGTCGTGGACTGGCAAAAT     |
| PCNA forward  | GCCATATTGGAGATGCTGT      |
| PCNA reverse  | TGAGTGTACCCGTTGAAGA      |
| GAPDH forward | CGCTCTCTGCTCCTCCTGTTC    |
| GAPDH reverse | ATCCGTTGACTCCGACCTTCAC   |
